# Supplementary material for: A study on rapid and stable catalytic reduction of 4-nitrophenol by 2-hydroxyethylamine stabilized Fe3O4@Pt and its kinetic factors
Source: Royal Society of Chemistry journal article supplement (doi:10.1039/d3ra05298b), 2023-01-01
Supplement: d3ra05298b1.pdf [file d3ra05298b1.pdf]

## Supporting Information

# A Study on Rapid and Stable Catalytic Reduction of 4-Nitrophenol by 2- Hydroxyethylamine stabilized Fe<sub>3</sub>O<sub>4</sub>@Pt and Its Kinetic Factors

*Xia Xu,<sup>\*a</sup> Liming Yang,<sup>a</sup> Yanjun Cui<sup>a</sup> and Bing Hu<sup>a</sup>*

<sup>a</sup> College of Science, Gansu Agricultural University, No.1, Yingmen Village,

Lanzhou 730070, P. R. China.

E-mail: [xuxia@gsau.edu.cn](mailto:xuxia@gsau.edu.cn)

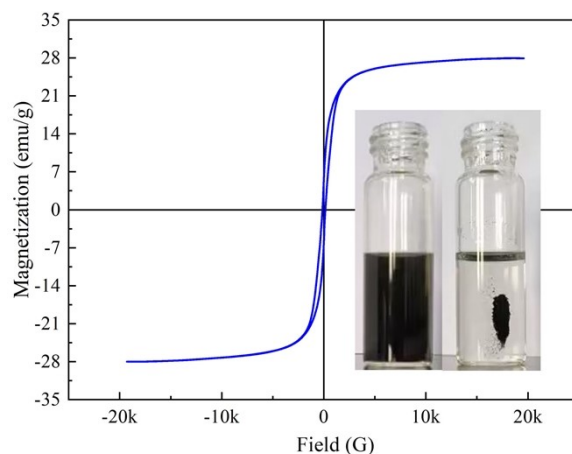

**Fig. S1** The magnetometer hysteresis loops of 2-hydroxyethylamine stabilized  $\text{Fe}_3\text{O}_4@Pt$ , and the effect of the recycling of the catalyst by magnetic separation.

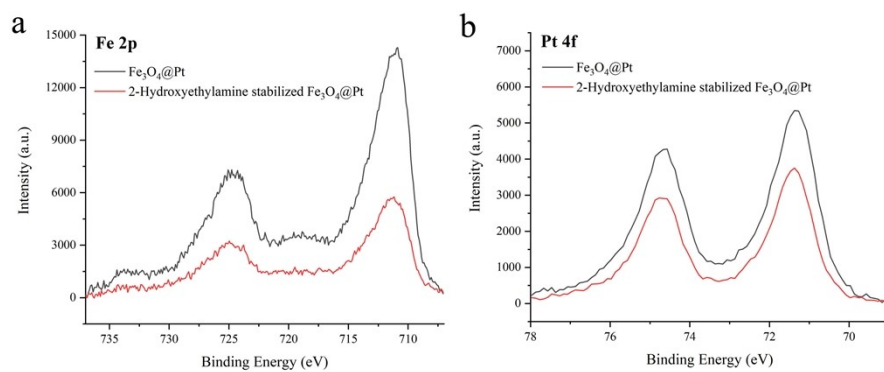

**Fig. S2** XPS fine spectra of (a) Fe 2p and (b) Pt 4f.

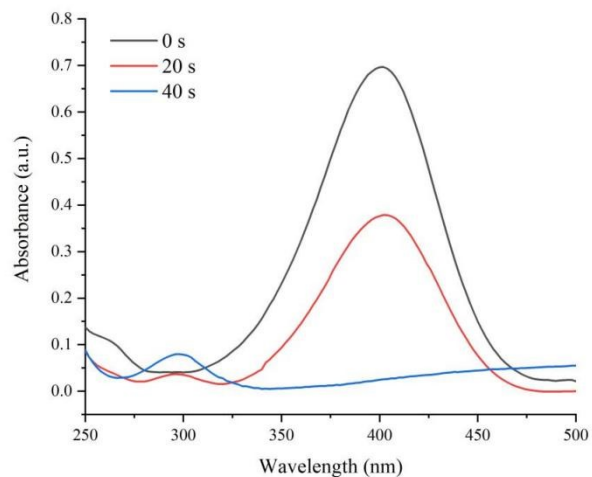

**Fig. S3** Time-dependent UV-vis absorption spectra for 4-NP catalyzed by 2-hydroxyethylamine stabilized  $\text{Fe}_3\text{O}_4@\text{Pt}$ .

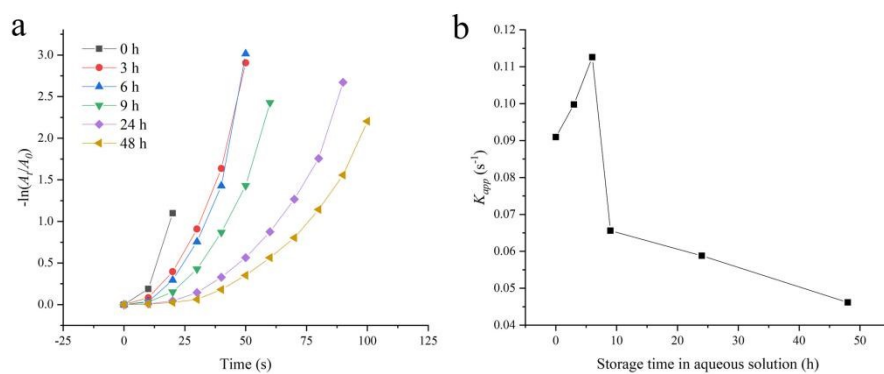

**Fig. S4** (a) Plots of  $-\ln(A_t/A_0)$  versus the reaction time  $t$  and (b) the relationship between reaction rate  $k_{app}$  and storage time in aqueous solution for 4-NP catalyzed by 2-hydroxyethylamine stabilized  $\text{Fe}_3\text{O}_4@\text{Pt}$  under the condition of 0.2 mL 2-hydroxyethylamine.

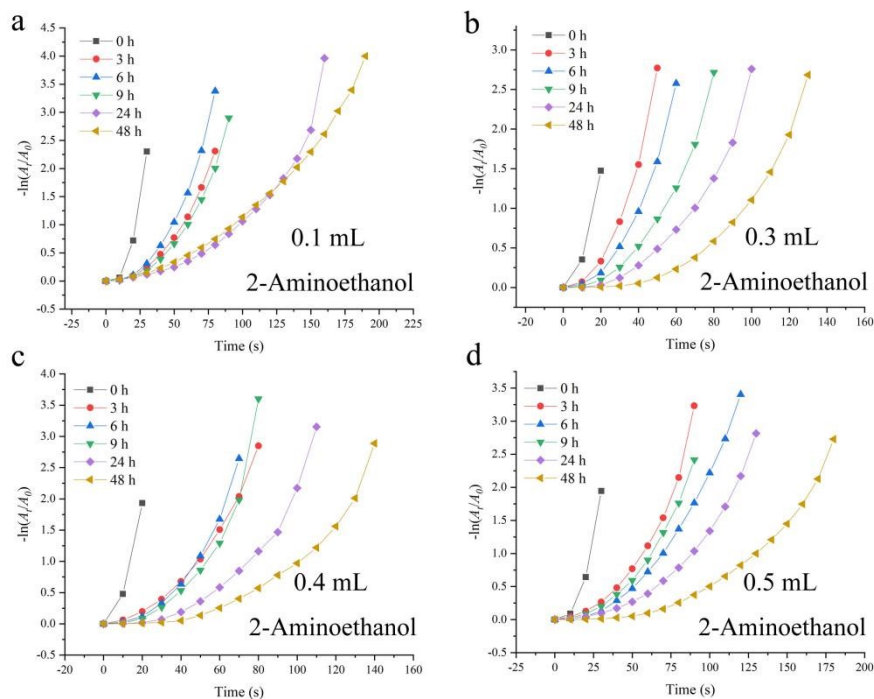

**Fig. S5** Plots of  $-\ln(A_t/A_0)$  versus the reaction time  $t$  for 4-NP catalyzed by 2-hydroxyethylamine stabilized  $\text{Fe}_3\text{O}_4@\text{Pt}$  under the condition of (a) 0.1 mL 2-hydroxyethylamine, (b) 0.3 mL 2-hydroxyethylamine, (c) 0.4 mL 2-hydroxyethylamine and (d) 0.5 mL 2-hydroxyethylamine.

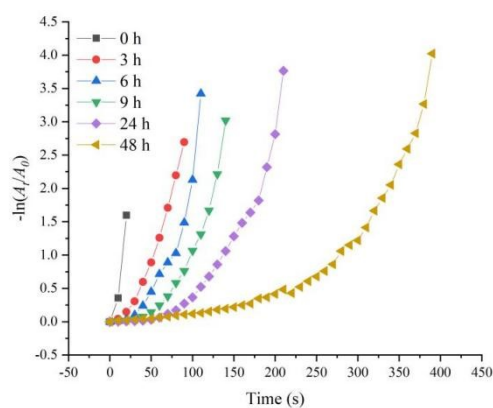

**Fig. S6** Plots of  $-\ln(A_t/A_0)$  versus reaction time  $t$  for the reduction of 4-NP catalyzed by  $\text{Fe}_3\text{O}_4@\text{Pt}$ .

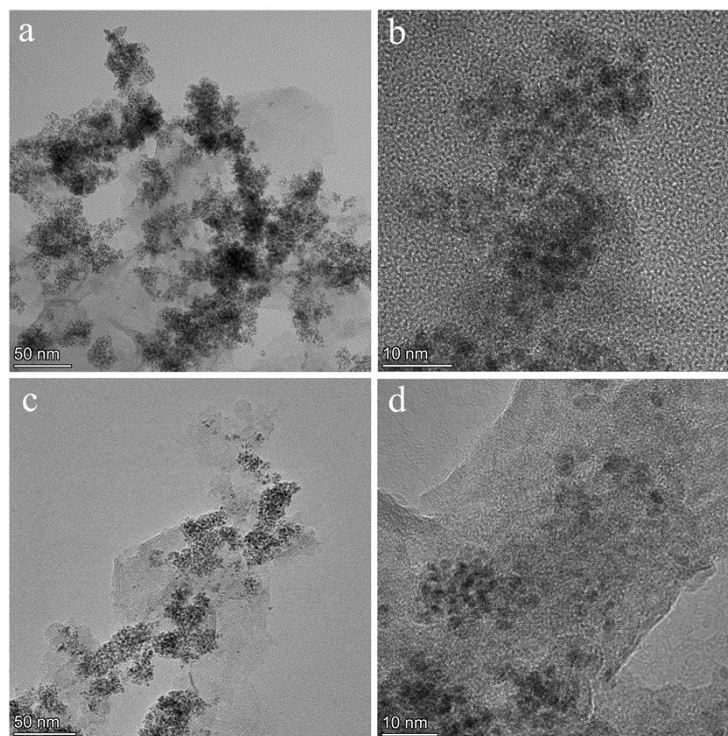

**Fig. S7** The TEM image of 2-Hydroxyethylamine stabilized  $\text{Fe}_3\text{O}_4@\text{Pt}$  under different amounts of 2-Hydroxyethylamine: (a, b) 0.2 mL 2-Hydroxyethylamine, (c and d) 0.5 mL 2-Hydroxyethylamine.

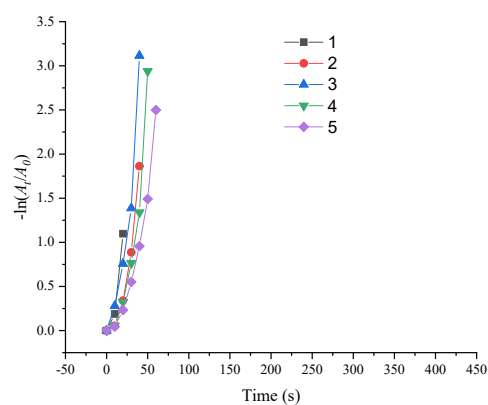

**Fig. S8** The reusability of 2-Hydroxyethylamine stabilized  $\text{Fe}_3\text{O}_4@\text{Pt}$  for five cycles of 4-NP reduction reaction.

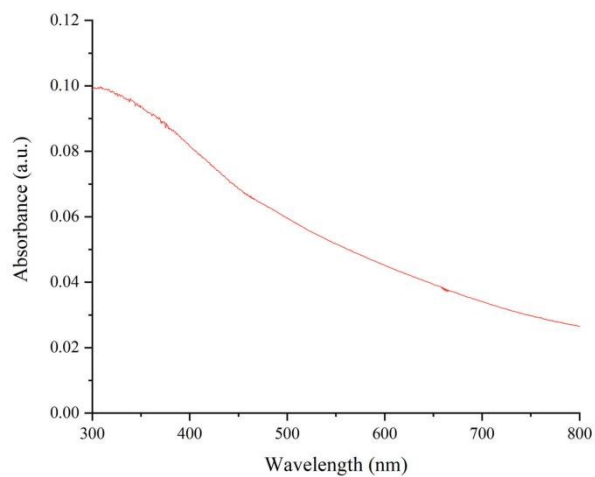

**Fig. S9** UV-vis absorption spectra of 2-hydroxyethylamine stabilized Fe<sub>3</sub>O<sub>4</sub>@Pt.

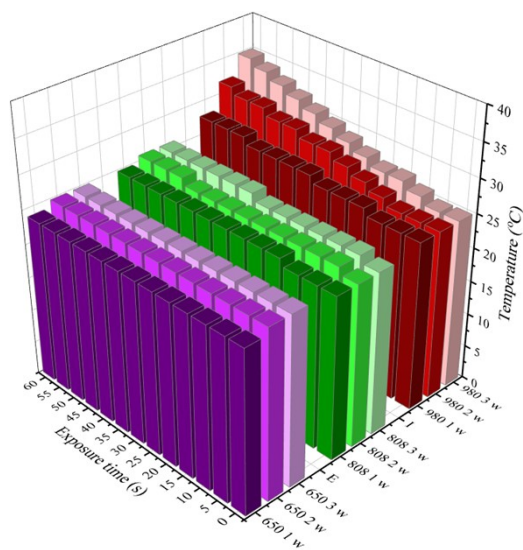

**Fig. S10** The temperature changes of aqueous solutions caused by light radiation at different radiation wavelengths and powers.
